# Supplementary material for: Trigonal NHC bis-pyridyl silver(i) complexes: a beacon of light in the darkness of light-emitting electrochemical cells?
Source: Royal Society of Chemistry journal article supplement (doi:10.1039/d4dt02473g), 2024-01-01
Supplement: d4dt02473g1.pdf [file d4dt02473g1.pdf]

## Trigonal NHC bis-pyridyl silver complexes a beacon of light in the darkness of LEC?

*Ginevra Giobbio,<sup>a,b</sup> Lucie Greffier,<sup>c</sup> Sophia Lipinski,<sup>b</sup> Anaïs Montrieul,<sup>a</sup> Jean-François Lohier,<sup>a</sup> Mathieu Linares,<sup>c</sup> Rubén D. Costa<sup>\*,b</sup> and Sylvain Gaillard<sup>\*,a</sup>*

<sup>a</sup> Dr. G. Giobbio, Anaïs Montrieul, Dr Jean-François Lohier and Dr. S. Gaillard  
Normandie University, ENSICAEN, UNICAEN, CNRS, LCMT, 14000 Caen, France. e-mail:  
[sylvain.gaillard@ensicaen.fr](mailto:sylvain.gaillard@ensicaen.fr)

<sup>b</sup> Dr. G. Giobbio and Prof. Dr. R. D. Costa  
Chair of Biogenic Functional Materials, Technical University of Munich, Campus Straubing for Biotechnology and Sustainability, Schulgasse 22, 94315 Straubing, Germany. e-mail: [ruben.costa@tum.de](mailto:ruben.costa@tum.de)

<sup>c</sup> Lucie Greffier  
Division of Theoretical Chemistry and Biology, School of Engineering Sciences in Chemistry, Biotechnology and Health, KTH Royal Institute of Technology, SE-100 44 Stockholm, Sweden

<sup>d</sup> Dr. M. Linares  
PDC Centre for High Performance Computing, EECS, KTH Royal Institute of Technology, Stockholm, Sweden

## Table of Content

|                                         |    |
|-----------------------------------------|----|
| Theoretical details                     | 3  |
| Synthesis of complex 1                  | 8  |
| NMR spectroscopy copies                 | 9  |
| X-Ray diffraction details               | 11 |
| Cyclic Voltammetry                      | 12 |
| Photophysical measurements of thin film | 13 |
| Electrochemical Impedance Spectroscopy  | 14 |
| References                              | 15 |

## Theoretical details

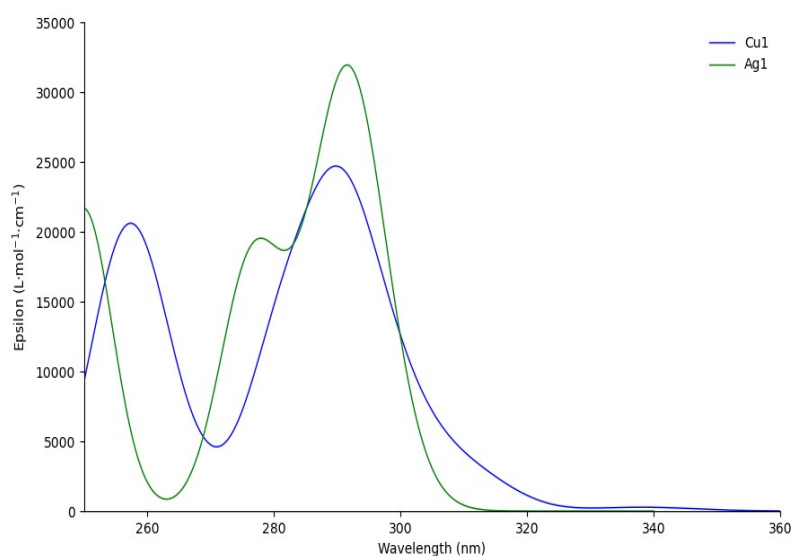

**Figure S1.** Theoretical UV-visible absorption spectra of **1** (green curve) and **2** (blue curve).

**Table S1.** Wavelengths (in eV and nm) for the calculated excited states and their oscillation strength for **1**. The excited states with a star (\*) are those with the highest oscillation forces.

|          | $\lambda$ (nm) | $\lambda$ (eV) | Oscillator Strength |
|----------|----------------|----------------|---------------------|
| State 1* | 281            | 4.41           | 0.2327              |
| State 2  | 277            | 4.48           | 0.0029              |
| State 3* | 277            | 4.48           | 0.135               |
| State 4  | 266            | 4.66           | 0.0006              |
| State 5* | 251            | 4.94           | 0.0776              |
| State 6* | 249            | 4.97           | 0.0813              |
| State 7  | 244            | 5.08           | 0.0022              |
| State 8  | 244            | 5.08           | 0.0016              |
| State 9  | 242            | 5.11           | 0.0073              |
| State 10 | 242            | 5.12           | 0.0045              |
| State 11 | 242            | 5.13           | 0.0081              |
| State 12 | 239            | 5.18           | 0.001               |

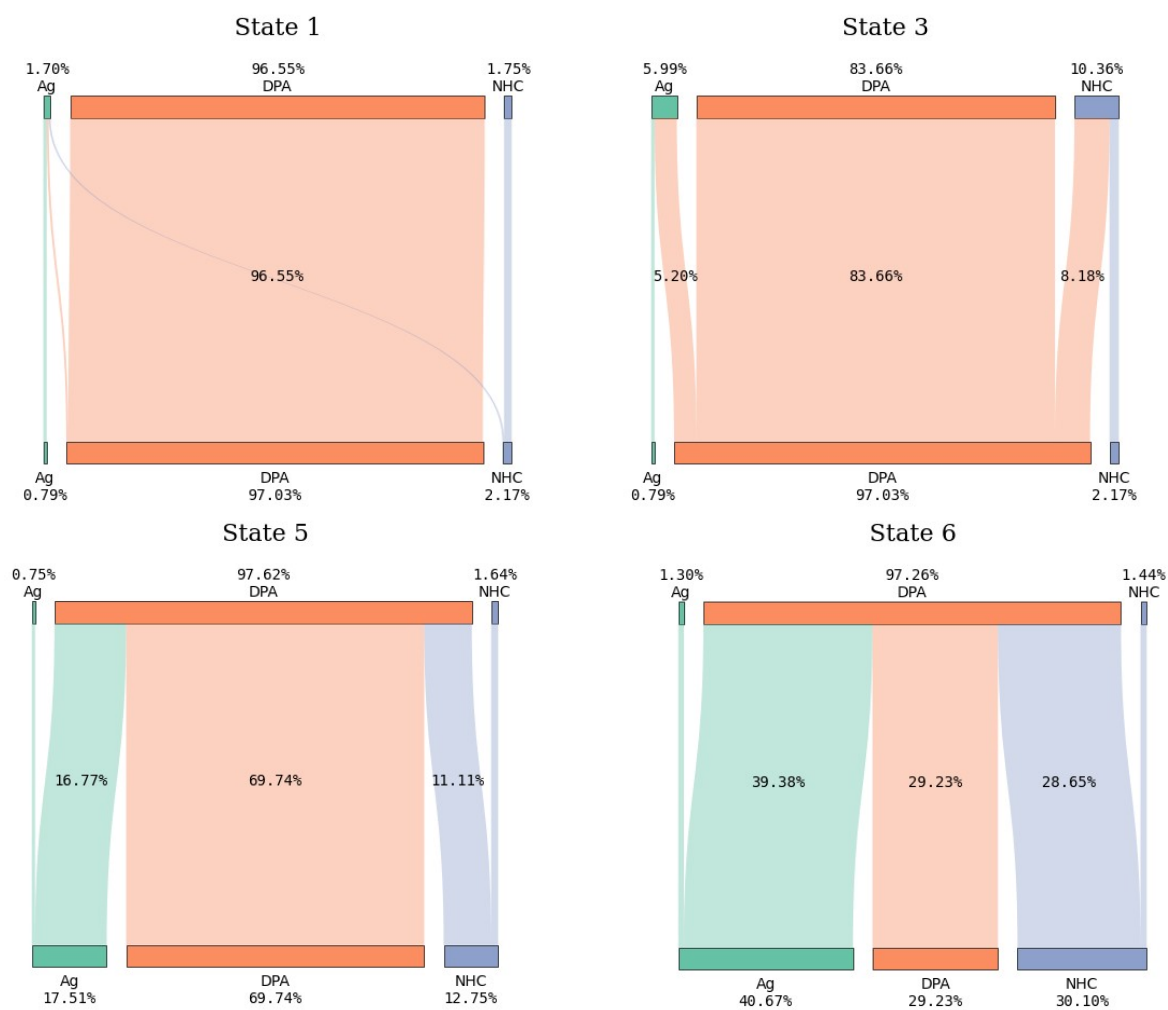

**Figure S2.** Calculated natural transition orbitals (NTOs) for **1**. The excited state 6 and 7 corresponded to the first band of the calculated UV-visible spectrum (250-275 nm, Figure S1) and excited states 1 and 3 to the second band of the calculated UV-visible spectrum (280-360 nm, Figure S1).

**Table S2.** Wavelengths (in eV and nm) for the calculated excited states and their oscillation strength for **2**. The excited states with a star (\*) are those with the highest oscillation forces.

|           | $\lambda$ (nm) | $\lambda$ (eV) | Oscillator Strength |
|-----------|----------------|----------------|---------------------|
| State 1   | 338            | 3.66           | 0.0021              |
| State 2   | 328            | 3.78           | 0                   |
| State 3   | 311            | 3.98           | 0.0179              |
| State 4*  | 300            | 4.13           | 0.0448              |
| State 5 * | 291            | 4.26           | 0.1298              |
| State 6   | 289            | 4.30           | 0.0208              |
| State 7*  | 281            | 4.41           | 0.0817              |
| State 8   | 281            | 4.42           | 0.0031              |
| State 9   | 281            | 4.42           | 0.0085              |
| State 10  | 267            | 4.64           | 0.0083              |
| State 11  | 262            | 4.73           | 0                   |
| State 12  | 260            | 4.77           | 0.0407              |
| State 13* | 260            | 4.77           | 0.0535              |
| State 14  | 255            | 4.86           | 0.0045              |
| State 15  | 255            | 4.87           | 0.0021              |
| State 16* | 255            | 4.87           | 0.0381              |
| State 17* | 254            | 4.88           | 0.0432              |
| State 18  | 250            | 4.97           | 0.004               |
| State 19  | 249            | 4.98           | 0.0002              |
| State 20  | 248            | 4.99           | 0.0041              |

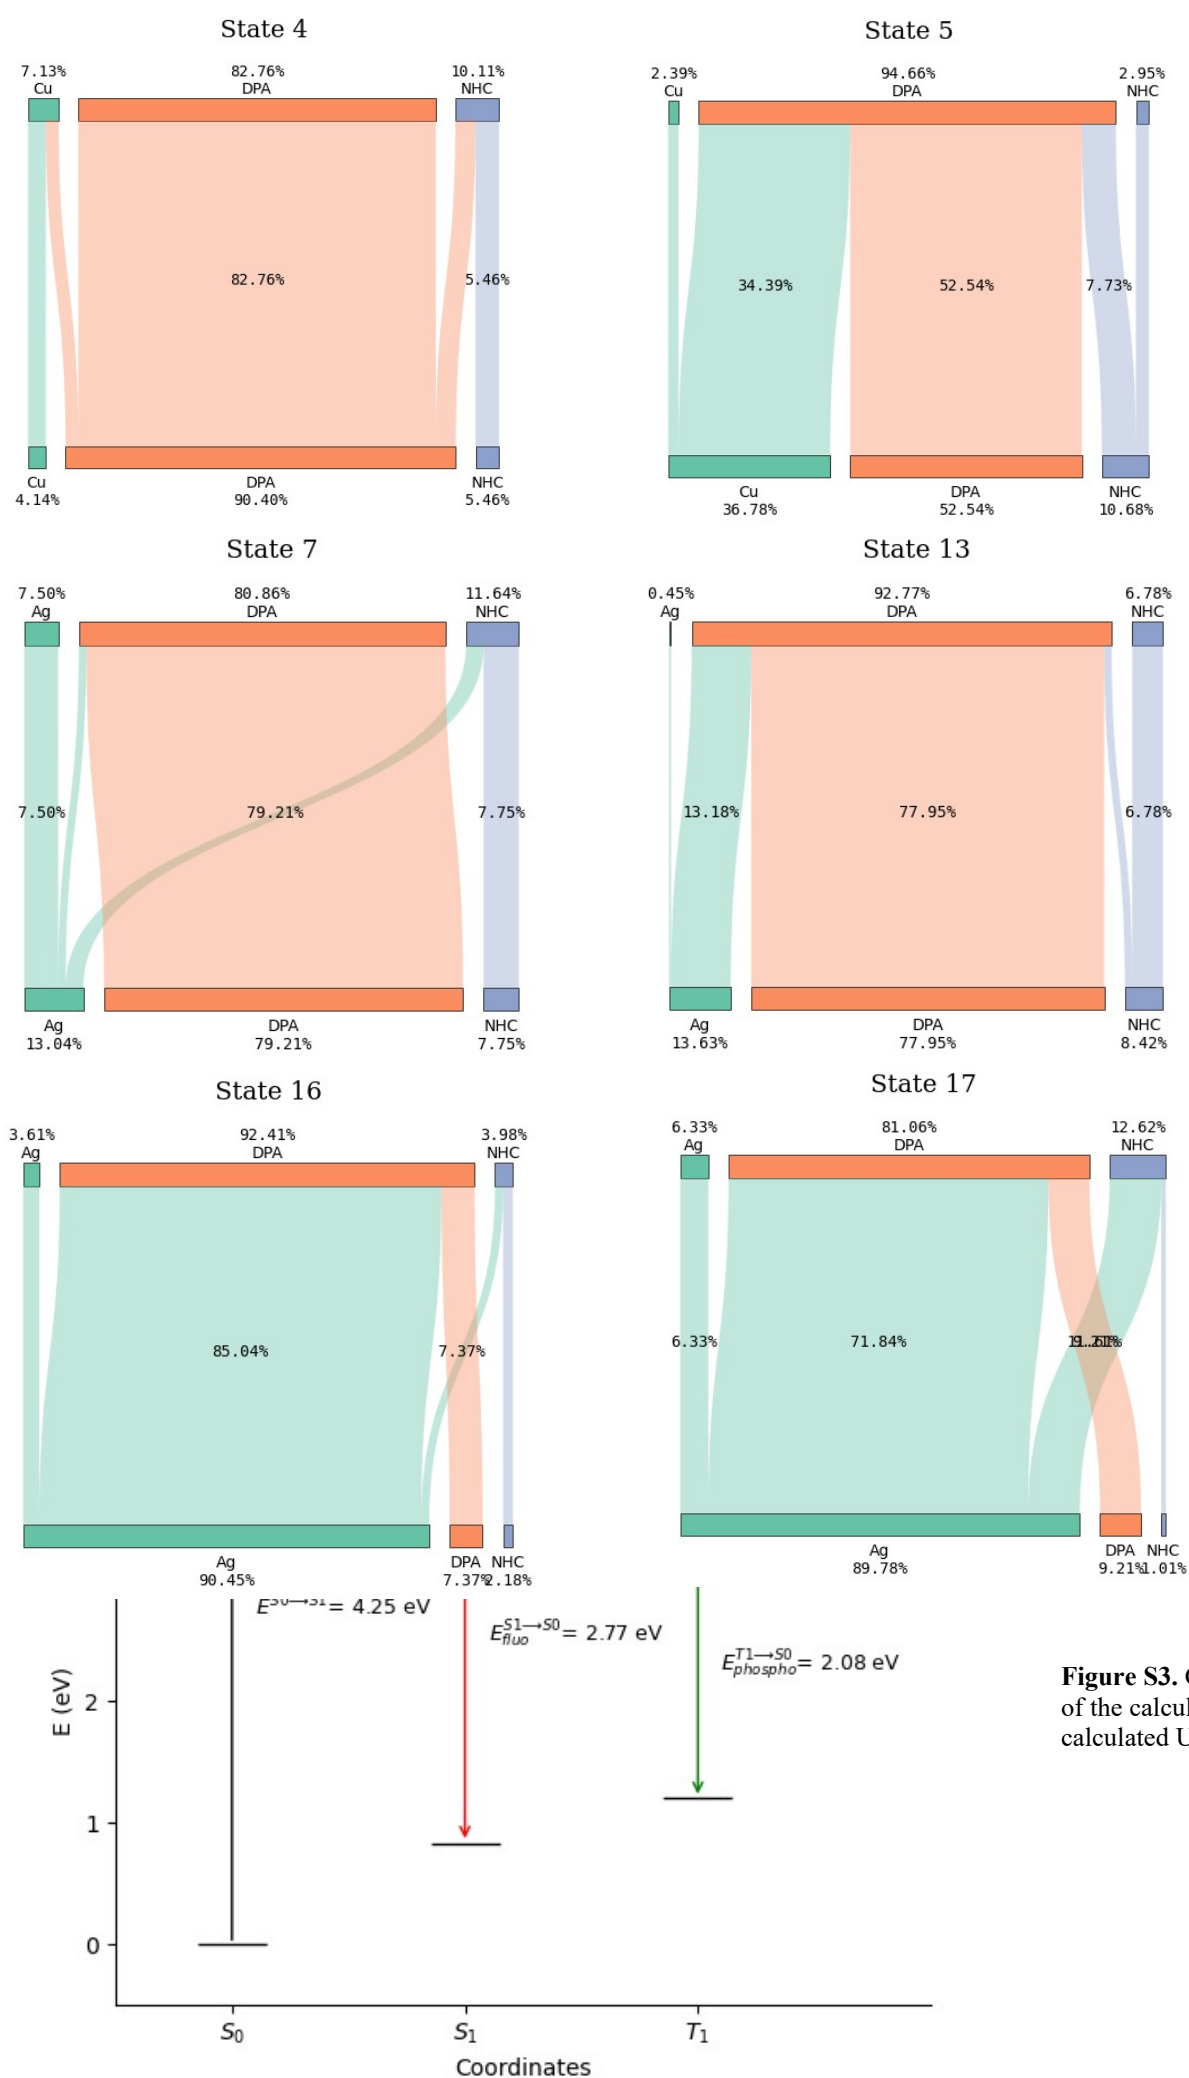

**Figure S3.** Calculated natural transition orbitals (NTOs) of the calculated UV-visible spectrum and the calculated UV-visible spectrum.

**Figure S4.** Jablonski diagram of **1**. The black dashes correspond to the ground state ( $S_0$ ), the red to the first singlet excited state ( $S_1$ ) and the green to the first triplet excited state ( $T_1$ ).

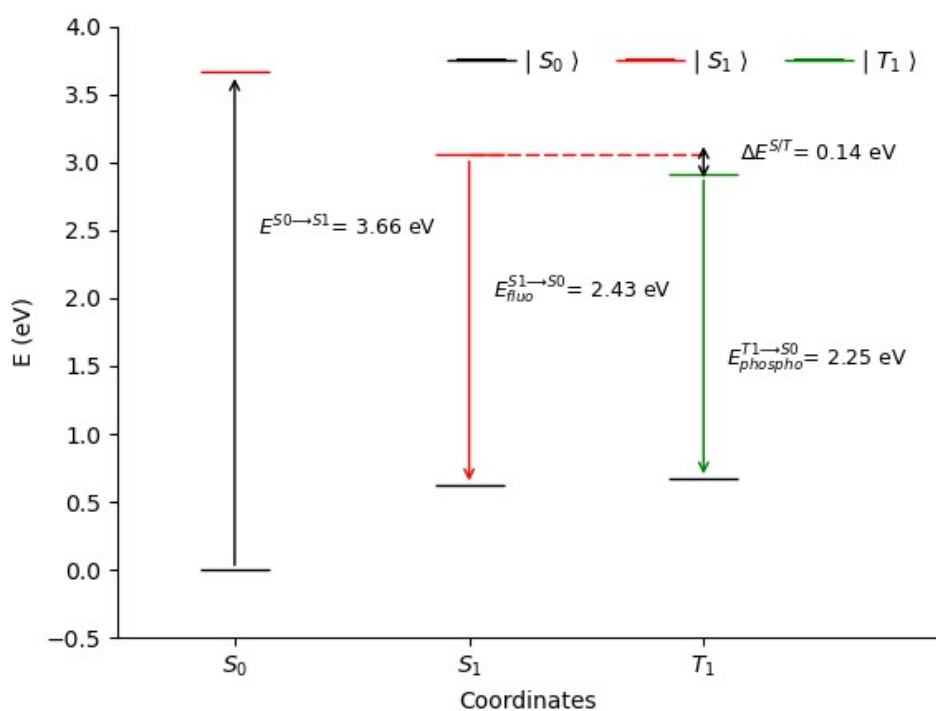

**Figure S5.** Jablonski diagram of excited state ( $S_1$ ) and the green t

## Synthesis of complex **1**

The  $[\text{Ag}(\text{IPr})\text{Cl}]$  complex (1 eq.) and 3,3'-dimethyl-2,2'-dipyridylamine ( $^3\text{-Me}_2\text{dpa}$ ) (1.05 eq.) were dissolved in degassed absolute ethanol in a flame-dried Schlenk tube under an argon atmosphere. The mixture was heated to reflux for 1 hour. After cooling to room temperature, a saturated aqueous solution of  $\text{KPF}_6$  was introduced, resulting in the formation of a white precipitate. The solid was

subsequently washed with water and diethyl ether before being dried under vacuum.

[Ag(IPr)(<sup>3</sup>-Me<sub>6</sub>dpa)][PF<sub>6</sub>] – **1**: The white precipitate have been dissolved in the minimum amount of dichloromethane. The pure complex has been isolated as white needle-like crystals by slow diffusion of diethyl ether in the DCM solution (y = 30 %). <sup>1</sup>H NMR (CDCl<sub>3</sub>, 500 MHz): δ 1.12 (d, *J* = 6.9 Hz, 12H), 1.26 (d, *J* = 6.9 Hz, 12H), 2.30 (s, 6H), 2.57 (sept, *J* = 6.9 Hz, 4H), 6.01 (s, 2H), 6.47 (t, *J* = 7.0 Hz, 2H), 6.57 (br s, 1H), 7.39 (d, *J* = 1.8 Hz, 2H), 7.40 (d, *J* = 7.9 Hz, 4H), 7.45 (d, *J* = 7.3 Hz, 2H), 7.67 (t, *J* = 7.8 Hz, 2H) ppm. <sup>13</sup>C NMR (CDCl<sub>3</sub>, 151 MHz): δ 17.5 (s), 23.9 (s), 25.0 (s), 29.0 (s), 117.1 (s), 121.8 (s), 124.2 (d, *J*<sub>Ag-C</sub> = 7.7 Hz, C imidazole), 124.8 (s), 130.8 (s), 135.7 (s), 140.3 (s), 140.2 (s), 146.4 (s), 146.9 (s), 152.5 (s), 185.7 (d, *J* (<sup>13</sup>C-<sup>107</sup>Ag) = 250.3 Hz), 185.7 (d, *J* (<sup>13</sup>C-<sup>109</sup>Ag) = 291.1 Hz) ppm. <sup>31</sup>P NMR (CDCl<sub>3</sub>, 202 MHz): δ -144.36 (sept, *J* (<sup>31</sup>P-<sup>19</sup>F) = 710.7 Hz, 1P) ppm. <sup>19</sup>F NMR (CDCl<sub>3</sub>, 471 MHz): δ -73.71 (d, *J* (<sup>19</sup>F-<sup>31</sup>P) = 713.0 Hz, 6F) ppm. HRMS (ESI): *m/z* calcd for C<sub>39</sub>H<sub>49</sub>N<sub>5</sub>Ag[M-PF<sub>6</sub>]<sup>+</sup> 694.3039, found 694.3034. IR 3435.5, 2926.5, 1738, 1590, 1462, 1117, 1004, 836, 557 cm<sup>-1</sup>.

## NMR spectroscopy copies

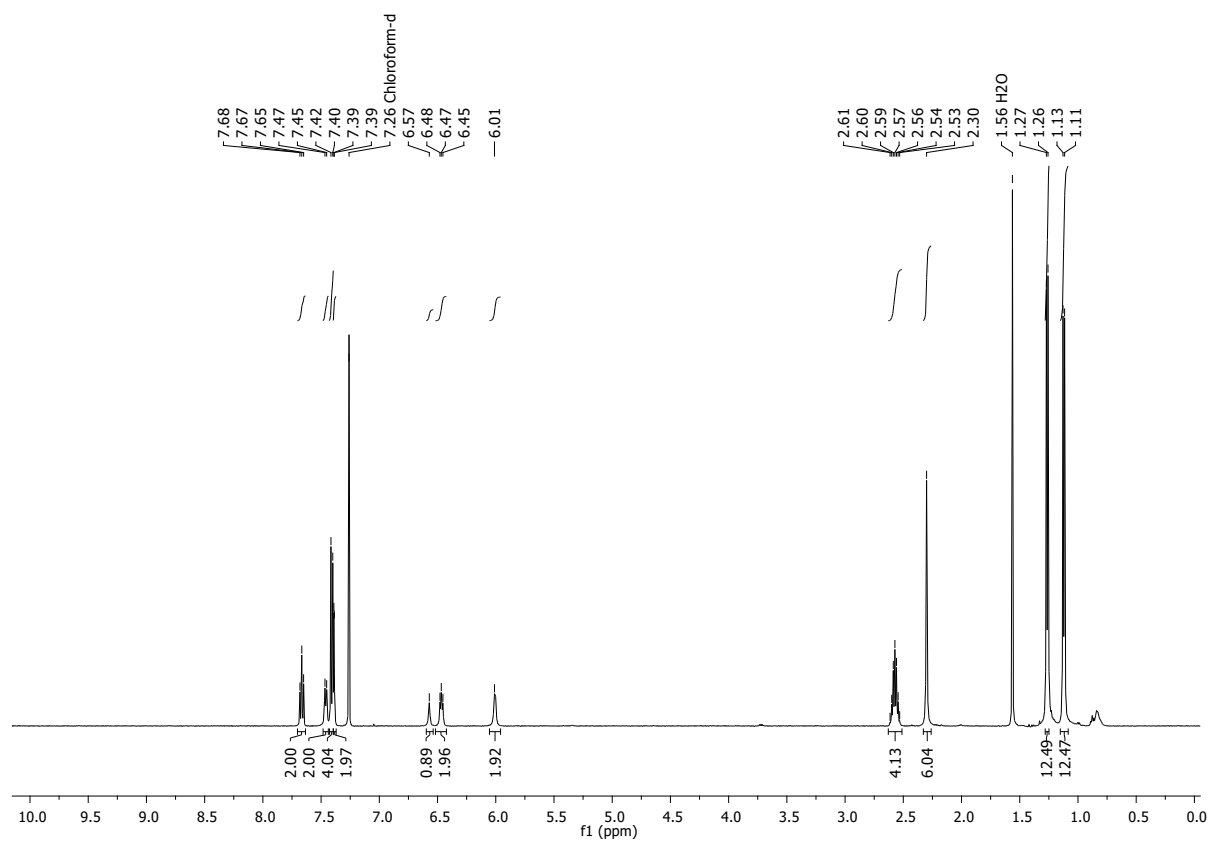

**Figure S6.** <sup>1</sup>H NMR (CDCl<sub>3</sub>, 500 MHz) of [Ag(IPr)(<sup>3</sup>-Medpa)][PF<sub>6</sub>] (1).

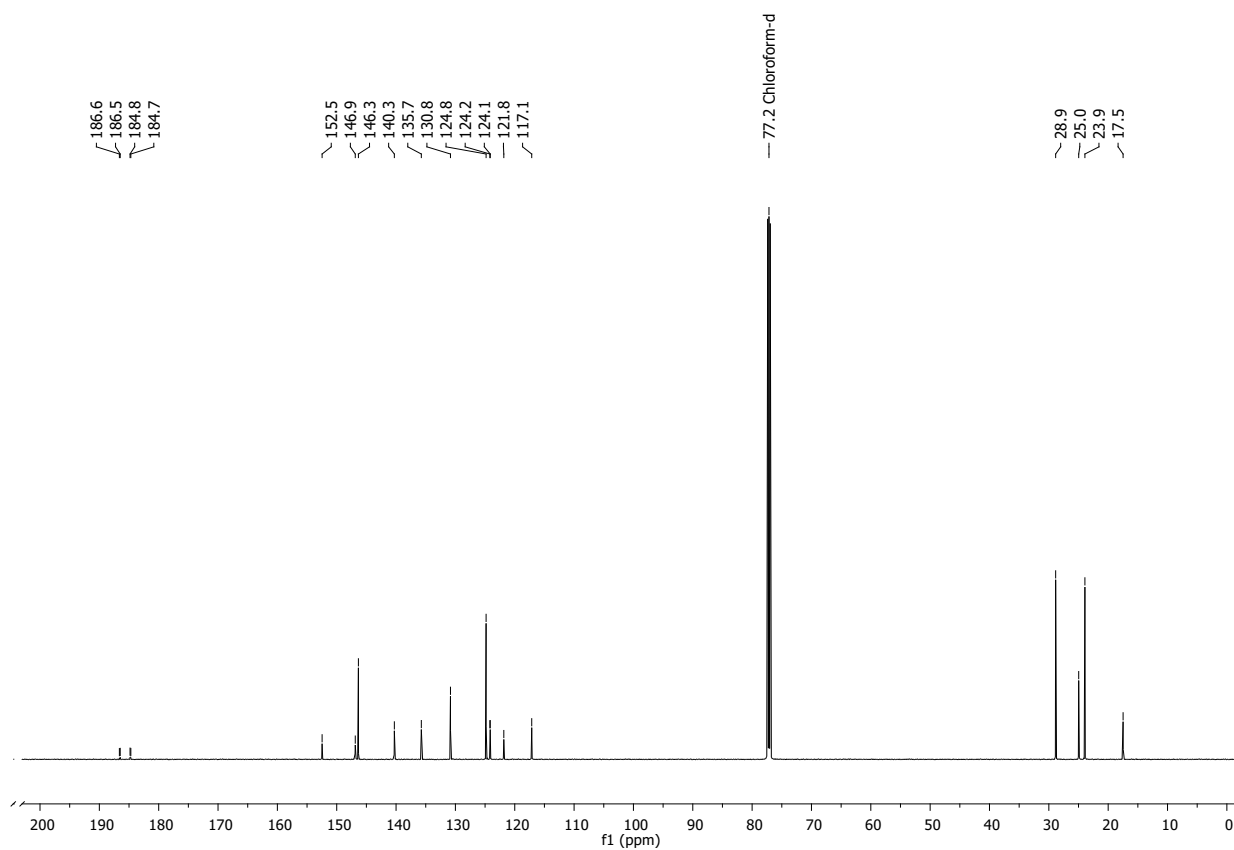

**Figure S7.** <sup>13</sup>C NMR (CDCl<sub>3</sub>, 151 MHz) of [Ag(IPr)(<sup>3</sup>-Medpa)][PF<sub>6</sub>] (1).

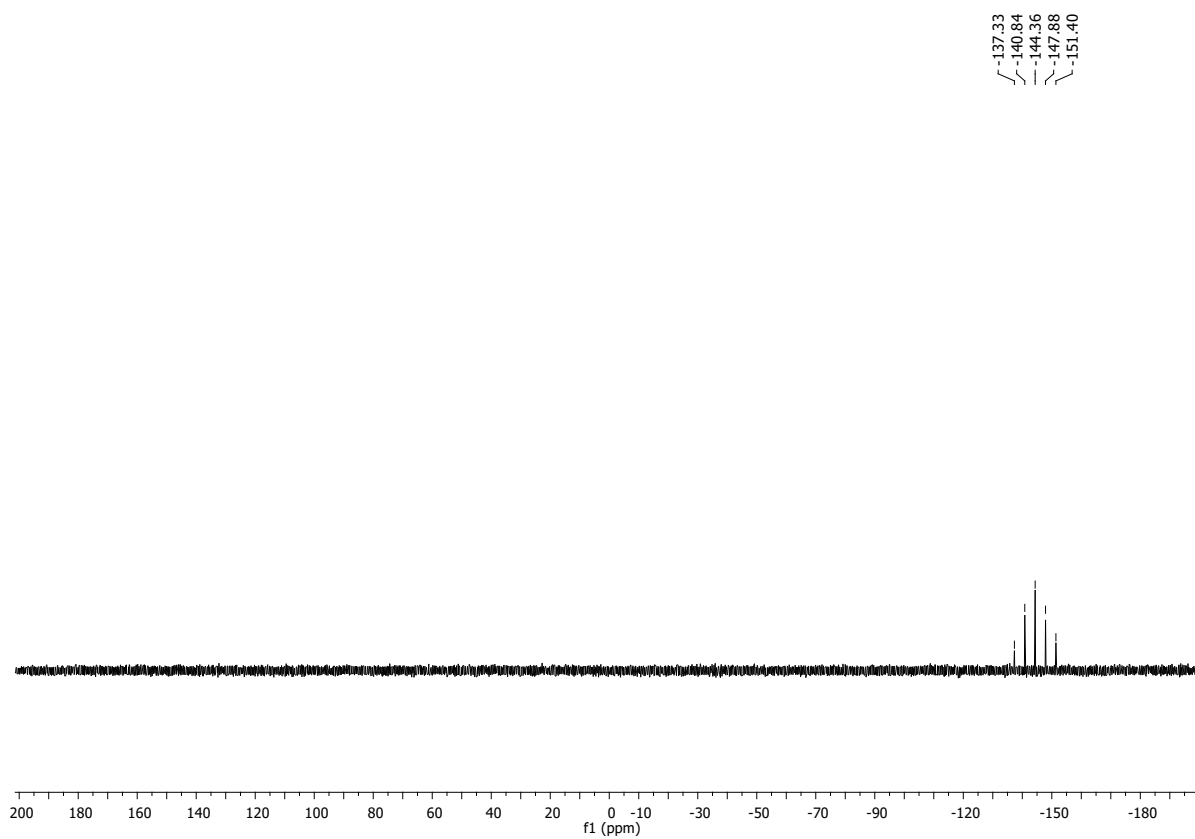

**Figure S8.**  $^{31}\text{P}$  NMR ( $\text{CDCl}_3$ , 202 MHz) of  $[\text{Ag}(\text{IPr})(^3\text{-Mc dpa})][\text{PF}_6]$  (**1**).

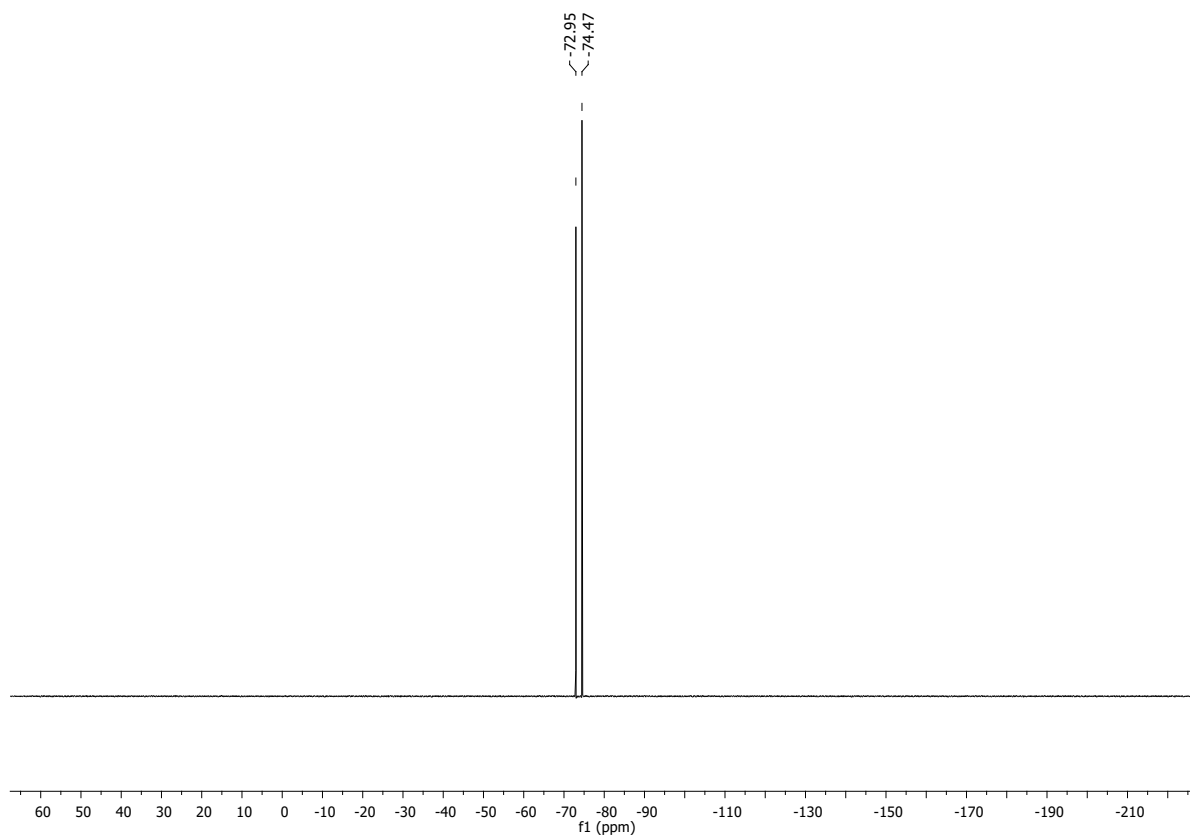

**Figure S9.**  $^{19}\text{F}$  NMR ( $\text{CDCl}_3$ , 471 MHz) of  $[\text{Ag}(\text{IPr})(^3\text{-Mc dpa})][\text{PF}_6]$  (**1**).

## X-Ray diffraction details

**Table S3.** Crystallographic data of complex **1**.

| <b>1</b>                                       |                                                                   |
|------------------------------------------------|-------------------------------------------------------------------|
| Formula                                        | C <sub>39</sub> H <sub>49</sub> AgF <sub>6</sub> N <sub>5</sub> P |
| M/g·mol <sup>-1</sup>                          | 840.67                                                            |
| Crystal system                                 | orthorhombic                                                      |
| Space group                                    | <i>P bca</i>                                                      |
| a/ Å                                           | 15.8119(5)                                                        |
| b/ Å                                           | 17.8148(5)                                                        |
| c/ Å                                           | 28.1724(9)                                                        |
| α/ °                                           | 90                                                                |
| β/ °                                           | 90                                                                |
| γ/ °                                           | 90                                                                |
| V/ Å <sup>3</sup>                              | 7935.8(4)                                                         |
| Z                                              | 8                                                                 |
| μ/ mm <sup>-1</sup>                            | 0.611                                                             |
| <i>ρ</i> <sub>calcd</sub> / g·cm <sup>-3</sup> | 1.407                                                             |
| λ (Mo K <sub>α</sub> )/ mm <sup>-1</sup>       | 0.71073                                                           |
| T/ K                                           | 123(2)                                                            |
| N° of reflections                              | 11620                                                             |
| N° of unique reflection                        | 9118                                                              |
| R <sub>int</sub>                               | 0.072503                                                          |
| R1, wR <sub>2</sub> (I > 2σ(I))                | 0.031473                                                          |
| R1, wR <sub>2</sub> (all data)                 | 0.048141                                                          |
| GOF                                            | 1.01949                                                           |

## Photophysical measurements of thin films

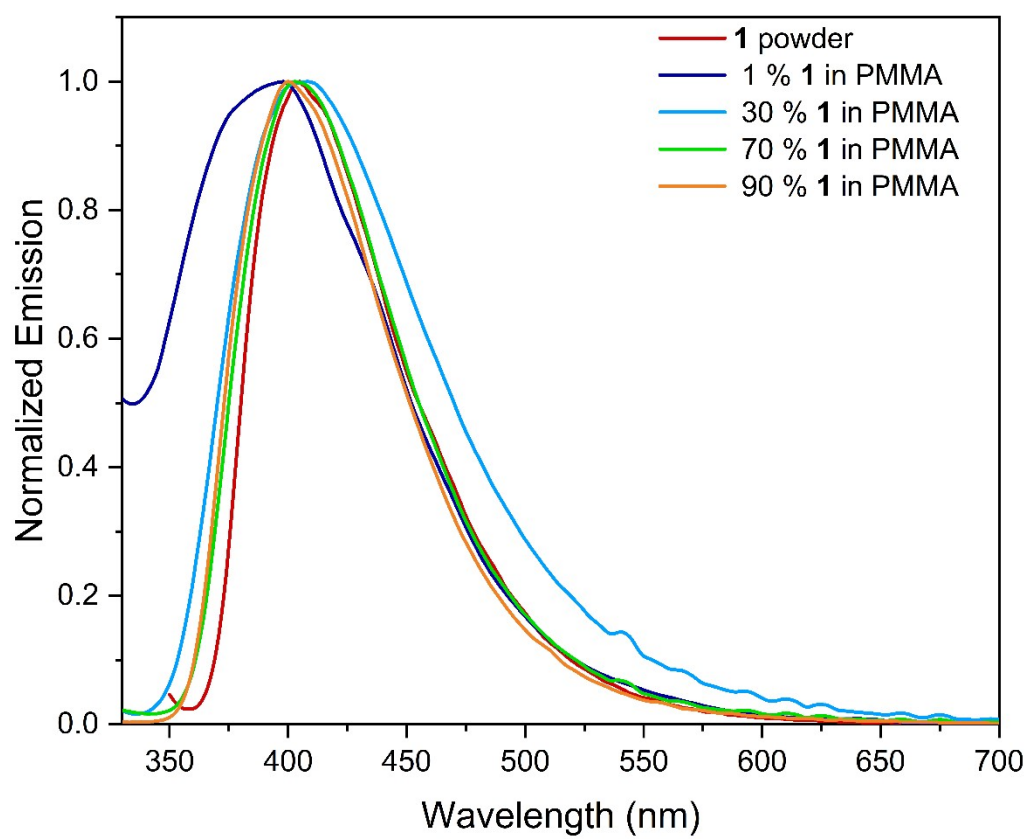

**Figure S10.** Emission spectra of **1** in thin film.

## Cyclic Voltammetry

General considerations: The cyclic voltammetry experiments were performed at room temperature with Autolab PGSTAT101 (Metrohm) potentiostat unit (Nova 2.1 software package). The standard three-electrodes configuration cell was equipped using a glassy-carbon as working electrode, platinum wire and Ag/AgCl as auxiliary and reference electrode, respectively. The measurement is performed at a step potential of 0.00244 V and scan rate of 0.005 V/s. The analysis was performed on a solution of  $[\text{Ag}(\text{IPr})(^3\text{-Me}_6\text{dpa})][\text{PF}_6]$  (**1**) in anhydrous and degassed  $n\text{-Bu}_4\text{NPF}_6$  (0.1 M) in THF. The system was calibrated with a solution of ferrocene ( $\text{Fc}/\text{Fc}^+ = 0.46$  V).

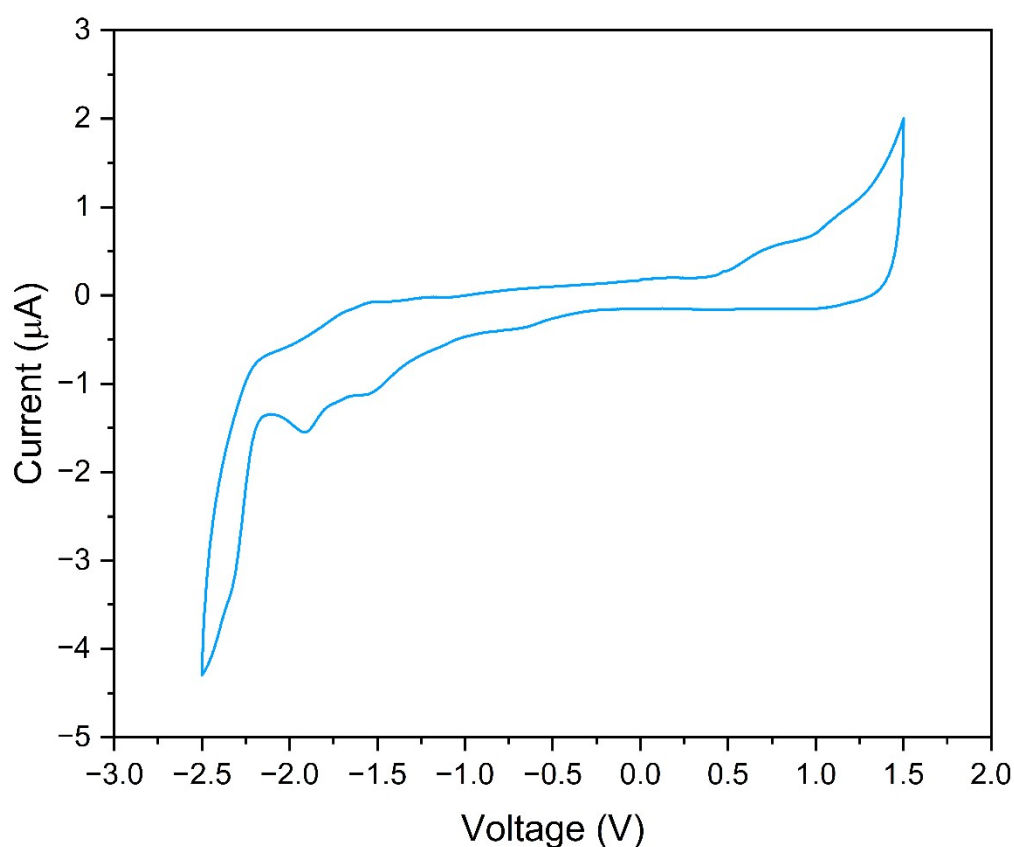

**Figure S11.** Cyclic voltammogram of  $[\text{Ag}(\text{IPr})(^3\text{-Me}_6\text{dpa})][\text{PF}_6]$  (**1**) in anhydrous and degassed  $n\text{-Bu}_4\text{NPF}_6$  (0.1 M) in THF with a scan rate of 0.005 V/s.

## Electrochemical Impedance Spectroscopy

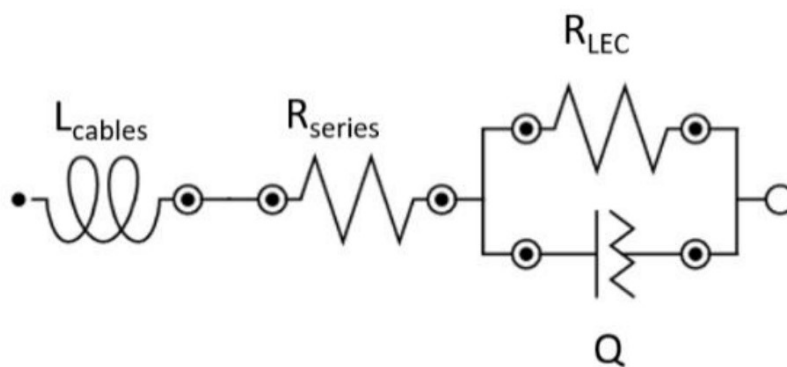

**Figure S12.** Simplified circuit model with electrical resistance ( $R_{\text{LEC}}$ ) and Constant Phase Element ( $Q$ ) used for static EIS assays. A series resistor ( $R_{\text{series}}$ ) and inductor elements for the cables ( $L_{\text{cables}}$ ) were also included.<sup>1,2</sup>

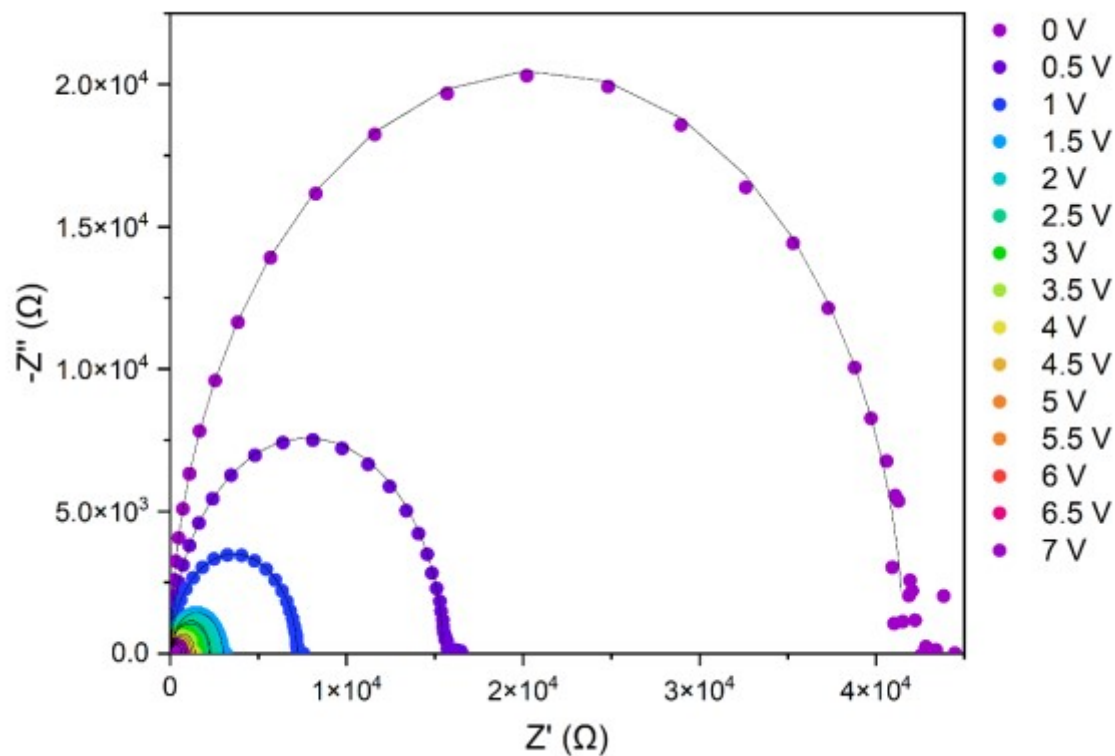

**Figure S13.** Nyquist plot of  $[\text{Ag}(\text{IPr})(^3\text{-Me-dpa})][\text{PF}_6]$  (**1**) – based fresh device.

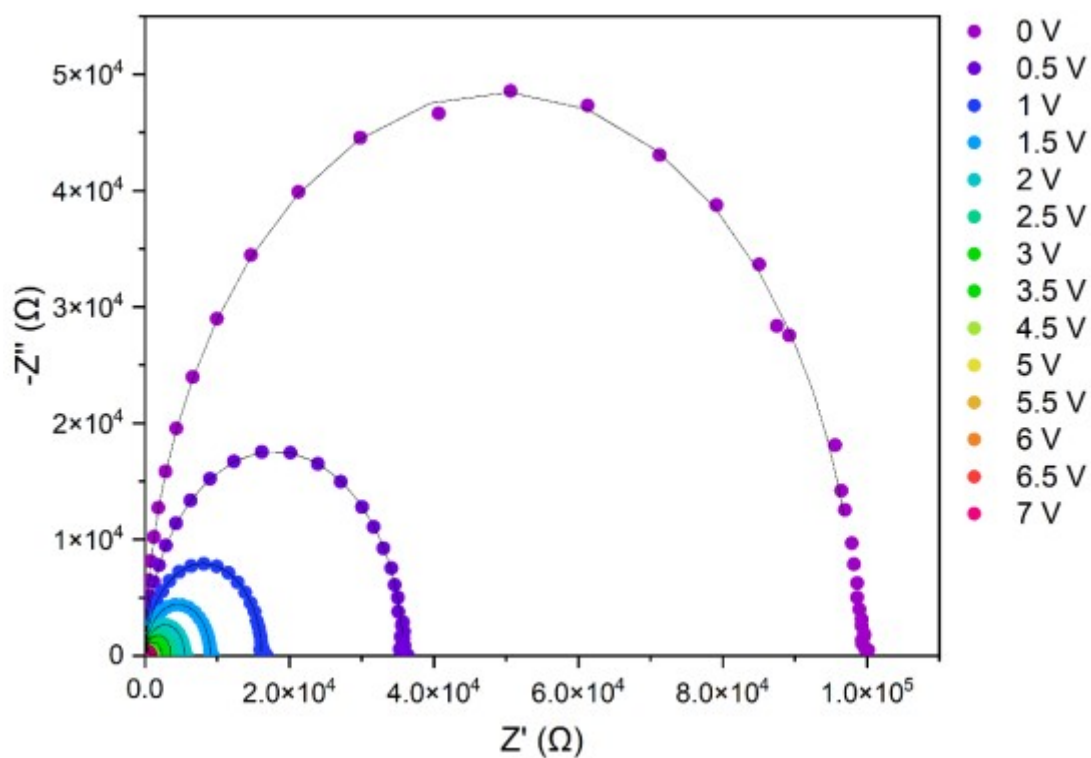

**Figure S14.** Nyquist plot of  $[\text{Ag}(\text{IPr})(^3\text{-Me-dpa})][\text{PF}_6]$  (**1**) – based used device.

## References

- 1 S.B. Meier, D. Hartmann, A. Winnacker and W. Sarfert, *J. Appl. Phys.*, 2014, **116**, 104504.
- 2 S. B. Meier, D. Hartmann, D. Tordera, H. J. Bolink, A. Winnacker and W. Sarfert, *Phys.Chem.Chem.Phys.*, 2012, **14**, 10886
